# Supplementary material
Source: PubMed Central journal article supplement (PMC6264890)
Supplement: NIHMS993731-supplement-Figures.pdf [file NIHMS993731-supplement-Figures.pdf]

Supplemental Table 7. NTA of orthologs in *M. tb* and *M. marinum*

| Protein | Gene    | <i>M. tb</i> |          | <i>M. marinum</i> |          |
|---------|---------|--------------|----------|-------------------|----------|
|         |         | Cytosolic    | Secreted | Cytosolic         | Secreted |
| DnaK    | Rv0350  | 18.2         | -        | 7.5               | 1.0      |
| GrpE    | Rv0351  | 40.4         | 30.7     | 22.6              | -        |
| GroEL2  | Rv0440  | 13.6         | 83.5     | 0.0*              | 9.7      |
| RplJ    | Rv0651  | 22.2         | -        | 51.5              | -        |
| Tuf     | Rv0685  | -            | 32.3     | 86.7              | -        |
| RplV    | Rv0706  | 47.2         | 49.9     | 9.2               | 6.3      |
| RplE    | Rv0716  | -            | 91.7     | 98.0              | 87.1     |
| GlpX    | Rv1099c | 73.9         | -        | 32.6              | -        |
| AtpD    | Rv1310  | 72.2         | 73.2     | 77.2              | 86.4     |
| Tkt     | Rv1449c | 31.4         | -        | 12.9              | 50.2     |
| GarA    | Rv1827  | 52.5         | -        | 62.7              | -        |
| Wag31   | Rv2145c | 2.0          | 15.2     | 44.97             | -        |
| DlaT    | Rv2215  | 38.7         | -        | 18.3              | -        |
| TB9.4   | Rv3208A | -            | 92.6     | 34.1              | -        |
| TrkA    | Rv3237c | 47.4         | -        | 13.6              | -        |
| EspB    | Rv3881c | 64.6         | 63.3     | 88.6              | 79.0     |

Values are representative of the percentage of NTA calculated using: % Ac in vitro: (Ac area)/(Ac area + exogenously Ac area)

\*Below limit of quantitation
